# Supplementary material for: Regeneration of Capto Core 700 resin through high throughput and laboratory scale studies and impact on production of a SARS‐CoV‐2 vaccine candidate
Source: PubMed Central journal article supplement (PMC9353343; doi:10.1002/biot.202200191), 2022-07-28
Supplement: BIOT-17-0-s001.pdf [file BIOT-17-0-s001.pdf]

## SUPPORTING INFORMATION

**Table S1: Details of 36 cleaning in place conditions screened using Capto Core 700 RoboColumns while purifying clarified cell culture harvest to generate the SARS-CoV-2 flowthrough product pool. Each condition was implemented by applying up to three different cleaning agents in three sequential cleaning in place steps. All cleaning agents were applied for 7 column volumes, with the exception of water which was applied for one column volume.**

| Condition | Cleaning in place step 1 (CIP1)             | Cleaning in place step 2 (CIP2)    | Cleaning in place step 3 (CIP3)    |
|-----------|---------------------------------------------|------------------------------------|------------------------------------|
| 1         | 1 N NaOH                                    | Water                              | 0.5 M acetic acid                  |
| 2         | 1 N NaOH                                    | Water                              | 20% (v/v) ethanol; 1 M acetic acid |
| 3         | 30% (v/v) isopropanol                       | Water                              | 0.5 M acetic acid                  |
| 4         | 30% (v/v) isopropanol                       | Water                              | 20% (v/v) ethanol; 1 M acetic acid |
| 5         | 30% (v/v) isopropanol; 1 N NaOH             | Water                              | 0.5 M acetic acid                  |
| 6         | 30% (v/v) isopropanol; 1 N NaOH             | Water                              | 20% (v/v) ethanol; 1 M acetic acid |
| 7         | 1 N NaOH                                    | 0.5 M acetic acid                  | None                               |
| 8         | 1 N NaOH                                    | 20% (v/v) ethanol; 1 M acetic acid | None                               |
| 9         | 30% (v/v) n-propanol                        | Water                              | 0.5 M acetic acid                  |
| 10        | 30% (v/v) n-propanol                        | Water                              | 20% (v/v) ethanol; 1 M acetic acid |
| 11        | 30% (v/v) n-propanol; 1 N NaOH              | Water                              | 0.5 M acetic acid                  |
| 12        | 30% (v/v) n-propanol; 1 N NaOH              | Water                              | 20% (v/v) ethanol; 1 M acetic acid |
| 13        | 30% (v/v) n-propanol                        | 0.5 M acetic acid                  | None                               |
| 14        | 30% (v/v) n-propanol                        | 20% (v/v) ethanol; 1 M acetic acid | None                               |
| 15        | 30% (v/v) n-propanol; 1 N NaOH              | 0.5 M acetic acid                  | None                               |
| 16        | 30% (v/v) n-propanol; 1 N NaOH              | 20% (v/v) ethanol; 1 M acetic acid | None                               |
| 17        | 30% (v/v) isopropanol                       | 0.5 M acetic acid                  | None                               |
| 18        | 30% (v/v) isopropanol                       | 20% (v/v) ethanol; 1 M acetic acid | None                               |
| 19        | 30% (v/v) isopropanol; 1 N NaOH             | 0.5 M acetic acid                  | None                               |
| 20        | 30% (v/v) isopropanol; 1 N NaOH             | 20% (v/v) ethanol; 1 M acetic acid | None                               |
| 21        | 30% (v/v) n-propanol                        | Water                              | None                               |
| 22        | 30% (v/v) n-propanol; 1 N NaOH              | Water                              | None                               |
| 23        | 30% (v/v) isopropanol                       | Water                              | None                               |
| 24        | 30% (v/v) isopropanol; 1 N NaOH             | Water                              | None                               |
| 25        | 0.5 M acetic acid                           | Water                              | None                               |
| 26        | 20% (v/v) ethanol; 1 M acetic acid          | Water                              | None                               |
| 27        | 1 N NaOH                                    | None                               | None                               |
| 28        | 30% (v/v) n-propanol                        | None                               | None                               |
| 29        | 30% (v/v) n-propanol; 1 N NaOH              | None                               | None                               |
| 30        | 30% (v/v) isopropanol                       | None                               | None                               |
| 31        | 30% (v/v) isopropanol; 1 N NaOH             | None                               | None                               |
| 32        | 0.5 M acetic acid                           | None                               | None                               |
| 33        | 20% (v/v) ethanol; 1 M acetic acid          | None                               | None                               |
| 34        | 8 M urea; 1 M NaCl; 0.1 citric acid; pH 2.5 | None                               | None                               |
| 35        | 1 M acetic acid                             | None                               | None                               |
| 36        | 1 N NaOH                                    | Water                              | None                               |

**Table S2: Spearman's rank correlation coefficient and p-values per RoboColumn (RC) between total signals at optical absorbance (280 nm), determined from the chromatography flowthrough product pool (FT), cleaning in place step 1 (CIP1), cleaning in place step 2 (CIP2) and cleaning in place step 3 (CIP3), and the number of cycles.**

| RC | Spearman's rank correlation coefficient |       |      |       | p-value |        |        |        |
|----|-----------------------------------------|-------|------|-------|---------|--------|--------|--------|
|    | FT                                      | CIP1  | CIP2 | CIP3  | FT      | CIP1   | CIP2   | CIP3   |
| 1* | NA                                      | NA    | NA   | NA    | NA      | NA     | NA     | NA     |
| 2* | NA                                      | NA    | NA   | NA    | NA      | NA     | NA     | NA     |
| 3  | 0.80                                    | -0.40 | 0.80 | NA**  | 0.3333  | 0.7500 | 0.3333 | NA**   |
| 4  | 0.20                                    | -0.40 | 1.00 | 0.77  | 0.9167  | 0.7500 | 0.0833 | 0.5000 |
| 5  | 0.11                                    | -0.71 | 0.93 | -0.24 | 0.8397  | 0.0881 | 0.0067 | 0.6095 |
| 6  | 0.96                                    | -0.71 | 0.82 | 0.00  | 0.0028  | 0.0881 | 0.0341 | 1.0000 |
| 7  | 0.18                                    | -0.81 | 0.93 | 0.70  | 0.6320  | 0.0082 | 0.0001 | 0.0240 |
| 8  | 0.66                                    | -0.93 | 0.92 | 0.48  | 0.0440  | 0.0001 | 0.0005 | 0.1556 |

\*, Not applicable (NA), data from a single cycle can not be used to calculate Spearman's rank correlation coefficient; \*\*, Total signals for RC3 were all negative and hence replaced by zero making the calculation of Spearman's rank correlation

**Table S3: One way analysis of variance of anti-Spike (S) quantitative western blotting and infectivity data based on chromatography flowthrough product pool yields for RoboColumns 7 and 8 and cycles 1, 4, 7 and 10 with cycle number being the tested factor.**

| <b>Anti-S Yields</b>                              | <i>Source</i>  | <i>SS<sup>a</sup></i> | <i>DF<sup>b</sup></i> | <i>MS<sup>c</sup></i> | <i>F-statistic</i> | <i>p-value</i> |
|---------------------------------------------------|----------------|-----------------------|-----------------------|-----------------------|--------------------|----------------|
|                                                   | <i>Columns</i> | 113.11                | 3                     | 37.70                 | 1.07               | 0.4561         |
|                                                   | <i>Error</i>   | 141.12                | 4                     | 35.28                 |                    |                |
|                                                   | <i>Total</i>   | 254.22                | 7                     |                       |                    |                |
| <b>Infectivity Yields</b>                         | <i>Source</i>  | <i>SS<sup>a</sup></i> | <i>DF<sup>b</sup></i> | <i>MS<sup>c</sup></i> | <i>F-statistic</i> | <i>p-value</i> |
|                                                   | <i>Columns</i> | 10684.79              | 3                     | 3561.60               | 5.69               | 0.0632         |
|                                                   | <i>Error</i>   | 2504.23               | 4                     | 626.06                |                    |                |
|                                                   | <i>Total</i>   | 13189.03              | 7                     |                       |                    |                |
| <b>Infectivity Yields (cycle 1 data excluded)</b> | <i>Source</i>  | <i>SS<sup>a</sup></i> | <i>DF<sup>b</sup></i> | <i>MS<sup>c</sup></i> | <i>F-statistic</i> | <i>p-value</i> |
|                                                   | <i>Columns</i> | 1496.68               | 2                     | 748.34                | 0.90               | 0.4952         |
|                                                   | <i>Error</i>   | 2503.92               | 3                     | 834.64                |                    |                |
|                                                   | <i>Total</i>   | 4000.60               | 5                     |                       |                    |                |

*a, Sum of squares; b, degrees of freedom; c, mean sum of squares*

**Table S4: One way analysis of variance of anti-Nucleoprotein quantitative western blotting data based on chromatography flowthrough product pool yields for each of RoboColumns (RCs) 3 - 8 with cycle number being the tested factor.**

| <b>RC3</b> | <i>Source</i>  | <i>SS<sup>a</sup></i> | <i>DF<sup>b</sup></i> | <i>MS<sup>c</sup></i> | <i>F-statistic</i> | <i>p-value</i> |
|------------|----------------|-----------------------|-----------------------|-----------------------|--------------------|----------------|
|            | <i>Columns</i> | 290.56                | 3                     | 96.85                 | 0.43               | 0.7382         |
|            | <i>Error</i>   | 1808.28               | 8                     | 226.04                |                    |                |
|            | <i>Total</i>   | 2098.84               | 11                    |                       |                    |                |
| <b>RC4</b> | <i>Source</i>  | <i>SS<sup>a</sup></i> | <i>DF<sup>b</sup></i> | <i>MS<sup>c</sup></i> | <i>F-statistic</i> | <i>p-value</i> |
|            | <i>Columns</i> | 322.20                | 3                     | 107.40                | 1.10               | 0.4042         |
|            | <i>Error</i>   | 781.93                | 8                     | 97.74                 |                    |                |
|            | <i>Total</i>   | 1104.13               | 11                    |                       |                    |                |
| <b>RC5</b> | <i>Source</i>  | <i>SS<sup>a</sup></i> | <i>DF<sup>b</sup></i> | <i>MS<sup>c</sup></i> | <i>F-statistic</i> | <i>p-value</i> |
|            | <i>Columns</i> | 833.82                | 6                     | 138.97                | 1.48               | 0.2381         |
|            | <i>Error</i>   | 1785.05               | 19                    | 93.95                 |                    |                |
|            | <i>Total</i>   | 2618.86               | 25                    |                       |                    |                |
| <b>RC6</b> | <i>Source</i>  | <i>SS<sup>a</sup></i> | <i>DF<sup>b</sup></i> | <i>MS<sup>c</sup></i> | <i>F-statistic</i> | <i>p-value</i> |
|            | <i>Columns</i> | 2245.83               | 6                     | 374.30                | 1.41               | 0.2593         |
|            | <i>Error</i>   | 5307.60               | 20                    | 265.38                |                    |                |
|            | <i>Total</i>   | 7553.43               | 26                    |                       |                    |                |
| <b>RC7</b> | <i>Source</i>  | <i>SS<sup>a</sup></i> | <i>DF<sup>b</sup></i> | <i>MS<sup>c</sup></i> | <i>F-statistic</i> | <i>p-value</i> |
|            | <i>Columns</i> | 2594.51               | 9                     | 288.28                | 2.01               | 0.0672         |
|            | <i>Error</i>   | 5009.25               | 35                    | 143.12                |                    |                |
|            | <i>Total</i>   | 7603.76               | 44                    |                       |                    |                |
| <b>RC8</b> | <i>Source</i>  | <i>SS<sup>a</sup></i> | <i>DF<sup>b</sup></i> | <i>MS<sup>c</sup></i> | <i>F-statistic</i> | <i>p-value</i> |
|            | <i>Columns</i> | 3779.45               | 9                     | 419.94                | 3.17               | 0.0066         |
|            | <i>Error</i>   | 4634.89               | 35                    | 132.43                |                    |                |
|            | <i>Total</i>   | 8414.34               | 44                    |                       |                    |                |

*a, Sum of squares; b, degrees of freedom; c, mean sum of squares*

**Table S5: Pairwise comparisons of RoboColumn 8 anti-Nucleoprotein quantitative western blotting data on based chromatography flowthrough product pool yields between cycles based on Tukey's method.**

| <b>Comparison</b>     | <b>Lower 95% Confidence interval</b> | <b>Mean difference</b> | <b>Upper 95% Confidence interval</b> | <b>p-value</b> |
|-----------------------|--------------------------------------|------------------------|--------------------------------------|----------------|
| Cycle 1 vs. Cycle 2   | -17.95                               | 11.71                  | 41.37                                | 0.9389         |
| Cycle 1 vs. Cycle 3   | -3.88                                | 25.78                  | 55.44                                | 0.1343         |
| Cycle 1 vs. Cycle 4   | -33.30                               | -3.64                  | 26.02                                | 1.0000         |
| Cycle 1 vs. Cycle 5   | -28.34                               | 0.02                   | 28.38                                | 1.0000         |
| Cycle 1 vs. Cycle 6   | -23.43                               | 4.94                   | 33.30                                | 0.9998         |
| Cycle 1 vs. Cycle 7   | -27.97                               | 0.40                   | 28.76                                | 1.0000         |
| Cycle 1 vs. Cycle 8   | -22.59                               | 5.78                   | 34.14                                | 0.9994         |
| Cycle 1 vs. Cycle 9   | -16.77                               | 11.59                  | 39.95                                | 0.9256         |
| Cycle 1 vs. Cycle 10  | -37.93                               | -9.57                  | 18.79                                | 0.9767         |
| Cycle 2 vs. Cycle 3   | -13.39                               | 14.07                  | 41.53                                | 0.7718         |
| Cycle 2 vs. Cycle 4   | -42.81                               | -15.35                 | 12.11                                | 0.6778         |
| Cycle 2 vs. Cycle 5   | -37.74                               | -11.69                 | 14.37                                | 0.8776         |
| Cycle 2 vs. Cycle 6   | -32.82                               | -6.77                  | 19.28                                | 0.9963         |
| Cycle 2 vs. Cycle 7   | -37.36                               | -11.31                 | 14.74                                | 0.8965         |
| Cycle 2 vs. Cycle 8   | -31.98                               | -5.93                  | 20.12                                | 0.9986         |
| Cycle 2 vs. Cycle 9   | -26.17                               | -0.12                  | 25.93                                | 1.0000         |
| Cycle 2 vs. Cycle 10  | -47.33                               | -21.28                 | 4.77                                 | 0.1913         |
| *Cycle 3 vs. Cycle 4  | -56.88                               | -29.42                 | -1.96                                | 0.0277         |
| Cycle 3 vs. Cycle 5   | -51.81                               | -25.76                 | 0.29                                 | 0.0547         |
| Cycle 3 vs. Cycle 6   | -46.90                               | -20.84                 | 5.21                                 | 0.2128         |
| Cycle 3 vs. Cycle 7   | -51.44                               | -25.38                 | 0.67                                 | 0.0613         |
| Cycle 3 vs. Cycle 8   | -46.06                               | -20.00                 | 6.05                                 | 0.2592         |
| Cycle 3 vs. Cycle 9   | -40.24                               | -14.19                 | 11.86                                | 0.7075         |
| *Cycle 3 vs. Cycle 10 | -61.40                               | -35.35                 | -9.30                                | 0.0020         |
| Cycle 4 vs. Cycle 5   | -22.39                               | 3.66                   | 29.71                                | 1.0000         |
| Cycle 4 vs. Cycle 6   | -17.48                               | 8.58                   | 34.63                                | 0.9802         |
| Cycle 4 vs. Cycle 7   | -22.02                               | 4.04                   | 30.09                                | 0.9999         |
| Cycle 4 vs. Cycle 8   | -16.64                               | 9.42                   | 35.47                                | 0.9640         |
| Cycle 4 vs. Cycle 9   | -10.82                               | 15.23                  | 41.28                                | 0.6223         |
| Cycle 4 vs. Cycle 10  | -31.98                               | -5.93                  | 20.12                                | 0.9986         |
| Cycle 5 vs. Cycle 6   | -19.65                               | 4.91                   | 29.48                                | 0.9995         |
| Cycle 5 vs. Cycle 7   | -24.19                               | 0.37                   | 24.94                                | 1.0000         |
| Cycle 5 vs. Cycle 8   | -18.81                               | 5.75                   | 30.32                                | 0.9983         |
| Cycle 5 vs. Cycle 9   | -13.00                               | 11.57                  | 36.13                                | 0.8443         |
| Cycle 5 vs. Cycle 10  | -34.15                               | -9.59                  | 14.97                                | 0.9426         |
| Cycle 6 vs. Cycle 7   | -29.10                               | -4.54                  | 20.02                                | 0.9997         |
| Cycle 6 vs. Cycle 8   | -23.72                               | 0.84                   | 25.40                                | 1.0000         |
| Cycle 6 vs. Cycle 9   | -17.91                               | 6.65                   | 31.22                                | 0.9949         |
| Cycle 6 vs. Cycle 10  | -39.07                               | -14.51                 | 10.06                                | 0.6091         |
| Cycle 7 vs. Cycle 8   | -19.18                               | 5.38                   | 29.94                                | 0.9990         |
| Cycle 7 vs. Cycle 9   | -13.37                               | 11.19                  | 35.76                                | 0.8674         |
| Cycle 7 vs. Cycle 10  | -34.53                               | -9.97                  | 14.60                                | 0.9285         |
| Cycle 8 vs. Cycle 9   | -18.75                               | 5.81                   | 30.38                                | 0.9982         |
| Cycle 8 vs. Cycle 10  | -39.91                               | -15.35                 | 9.22                                 | 0.5340         |
| Cycle 9 vs. Cycle 10  | -45.72                               | -21.16                 | 3.40                                 | 0.1417         |

\*. Significant difference in yields

**Table S6: One way analysis of variance of ELISA HCP data from the final product post ultrafiltration/diafiltration between cycles 1, 4, 7 and 10 with cycle number being the tested factor.**

| <i>Source</i>  | <i>SS<sup>a</sup></i> | <i>DF<sup>b</sup></i> | <i>MS<sup>c</sup></i> | <i>F-statistic</i> | <i>p-value</i> |
|----------------|-----------------------|-----------------------|-----------------------|--------------------|----------------|
| <i>Columns</i> | 0.03                  | 3                     | 0.01                  | 59.21              | 0.0009         |
| <i>Error</i>   | 0.00                  | 4                     | 0.00                  |                    |                |
| <i>Total</i>   | 0.03                  | 7                     |                       |                    |                |

*a, Sum of squares; b, degrees of freedom; c, mean sum of squares*

**Table S7: Pairwise comparisons of ELISA HCP data from the final product post ultrafiltration/diafiltration between cycles 1, 4, 7 and 10 based on Tukey's method.**

| <b>Comparison</b>    | <b>Lower 95% Confidence interval</b> | <b>Mean difference</b> | <b>Upper 95% Confidence interval</b> | <b>p-value</b> |
|----------------------|--------------------------------------|------------------------|--------------------------------------|----------------|
| Cycle 1 vs. Cycle 4  | -0.09                                | -0.04                  | 0.01                                 | 0.0777         |
| Cycle 1 vs. Cycle 7  | -0.19                                | -0.14                  | -0.09                                | 0.0012         |
| Cycle 1 vs. Cycle 10 | -0.04                                | 0.01                   | 0.06                                 | 0.9443         |
| Cycle 4 vs. Cycle 7  | -0.14                                | -0.09                  | -0.04                                | 0.0052         |
| Cycle 4 vs. Cycle 10 | 0.00                                 | 0.05                   | 0.10                                 | 0.0499         |
| Cycle 7 vs. Cycle 10 | 0.09                                 | 0.14                   | 0.19                                 | 0.0010         |

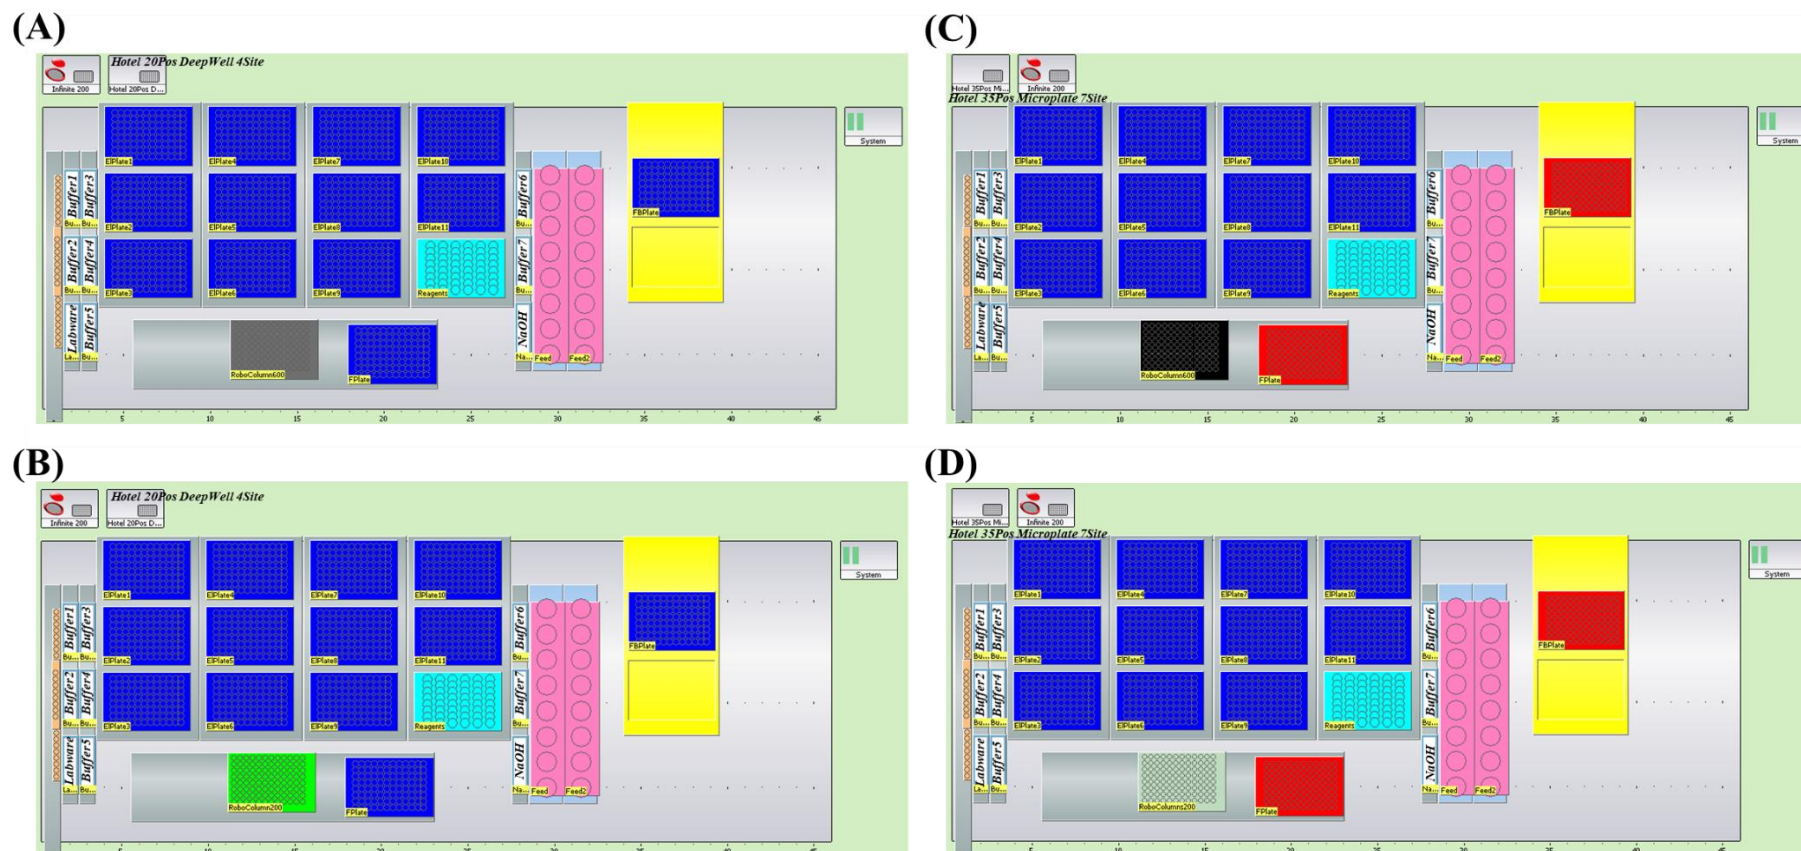

Figure S1: Deck layout of the employed Tecan EVO 150 robotic station used to run RoboColumn based experiments: (A) 600  $\mu$ L RoboColumns (*RoboColumn600*) with 2 mL deep well 96 well plates for fraction collection (*FPlate*); (B) 200  $\mu$ L RoboColumns (*RoboColumn200*) with 2 mL deep well 96 well plates for fraction collection (*FPlate*); (C) 600  $\mu$ L RoboColumns (*RoboColumn600*) with 360  $\mu$ L 96 well microplates for fraction collection (*FPlate*); (D) 200  $\mu$ L RoboColumns (*RoboColumn200*) with 360  $\mu$ L 96 well microplates for fraction collection (*FPlate*). The robot was equipped with a 8-channel liquid handling arm (left-hand side) and a robot manipulator arm (RoMa) (right-hand side). In (A) – (C): (i) *EIPlate1* – *EIPlate11* are 2 mL deep well 96 well plates containing elution buffers; (ii) *Reagents* is a 8 mL 48 well deep well plate containing equilibration, feed, wash, strip (or post-CIP flush here), CIP, and storage solutions in columns 1 – 6, respectively; *Feed* and *Feed2* are 50 mL Falcon tubes containing up to 8 different feeds, each at ~ 100 mL, and were used for high loadings instead of placing the feeds in the *Reagents* plate; *FBPlate* denotes the location of 96 well plates (deep well or microplates) containing buffers (i.e., blank plates) which were prepared by aliquoting into them solutions from labwares *EIPlate1* – *EIPlate11* and *Reagents*; 100 mL troughs *Buffer1* – *Buffer7*, *Labware* were empty and *NaOH* was filled with concentrated NaOH solution which was used to clean the tips. 100 mL troughs are placed on *Trough 3Pos 25+100ml* carriers. *EIPlate1* – *EIPlate11* and *Reagents* are placed on *MP 3Pos Flat* carriers with custom definitions to allow the placement of the Te-Shuttle module in front of them. *Feed* and *Feed2* are placed on *Falcon 8Pos 50mL* carriers. *FBPlate* is placed on the loading bay of the integrated Agilent Velocity 11 VSpin with access centrifuge. RoboColumns are placed on the Te-Chrom module and its height was adjusted to allow the collection of fractions in microplates or deep well plates. *FPlate* is placed on the Te-Shuttle (Transfer position) when a new fraction plate is to be generated. *FPlate* and *FBPlate* were handled by the RoMa which also moved the plates from the hotels to the robot's deck. The hotels are comprised of multiple *Hotel 9Pos* carriers. These were configured either as a single hotel with 7 z-sites and 5 x-sites (*Hotel 35Pos Microplate 7Site* carrier in A, B) for microplates, or as a single hotel with 4 z-sites and 5 x-sites (*Hotel 20Pos DeepWell 4Site* carrier in C, D) for deep well plates. The *Infinite 200* carrier is the Tecan Infinite M1000 Pro reader placed at the right-hand side of the robot's deck (grid 45).

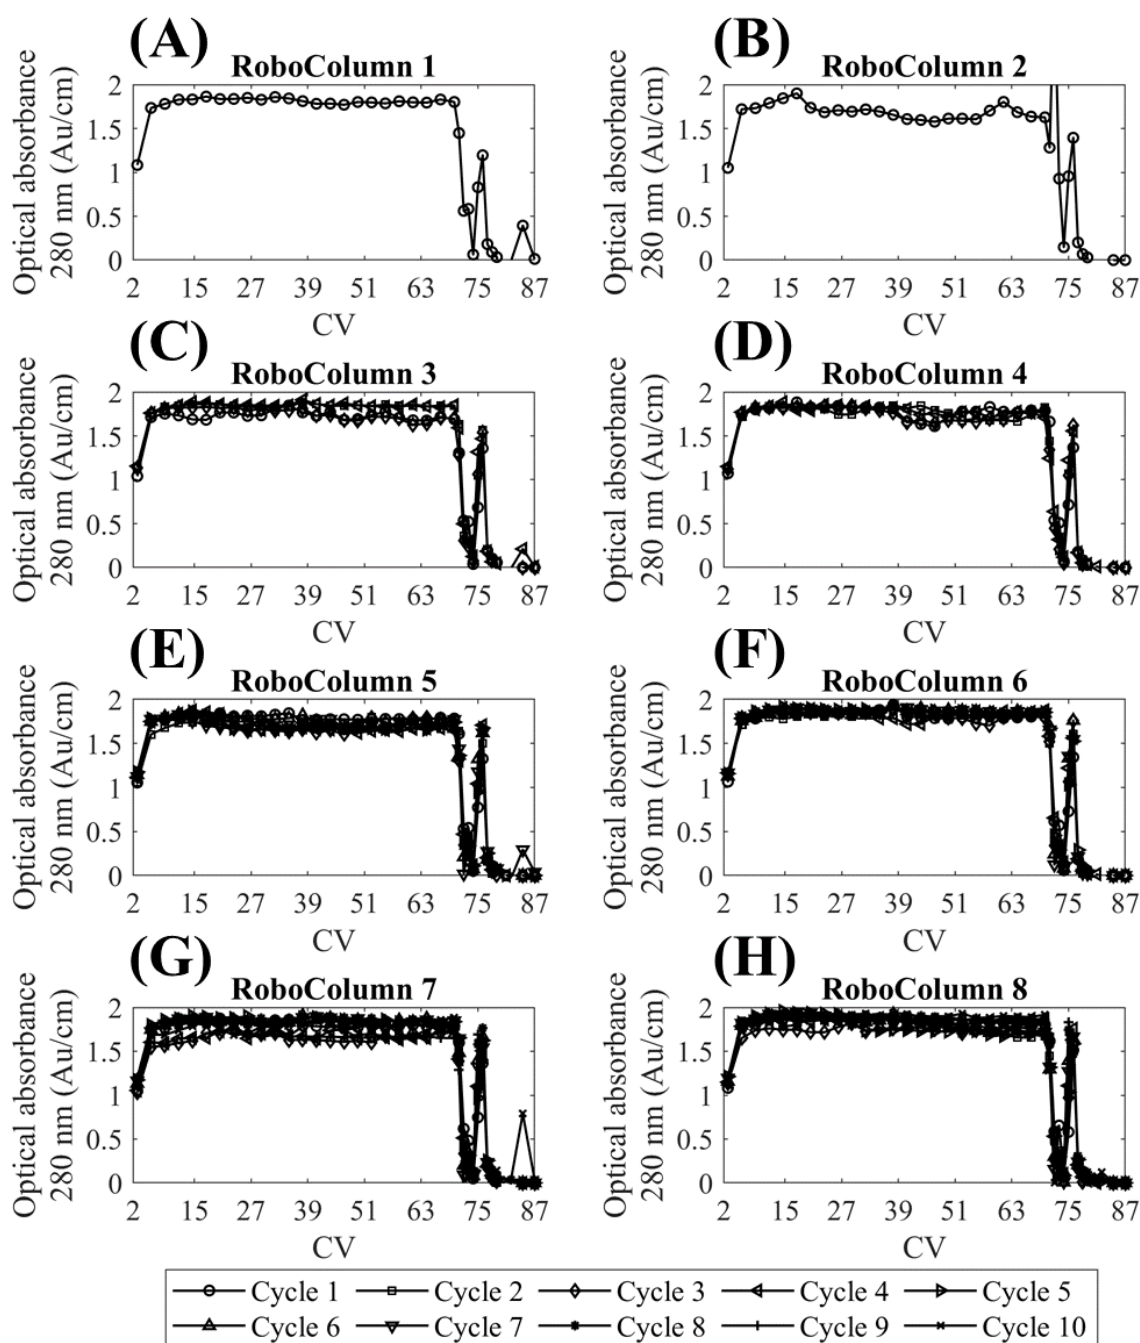

**Figure S2: Optical absorbance at 280 nm plotted against column volumes (CVs) across the ten re-use cycles for RoboColumns 1 – 8 in (A) – (H), respectively. In (A) – (H), lines with markers ( $\circ$ ), ( $\square$ ), ( $\diamond$ ), ( $\triangleleft$ ), ( $\triangleright$ ), ( $\triangle$ ), ( $\nabla$ ), ( $*$ ), ( $+$ ), ( $\times$ ) correspond to resin re-use cycles 1 – 10, respectively.**

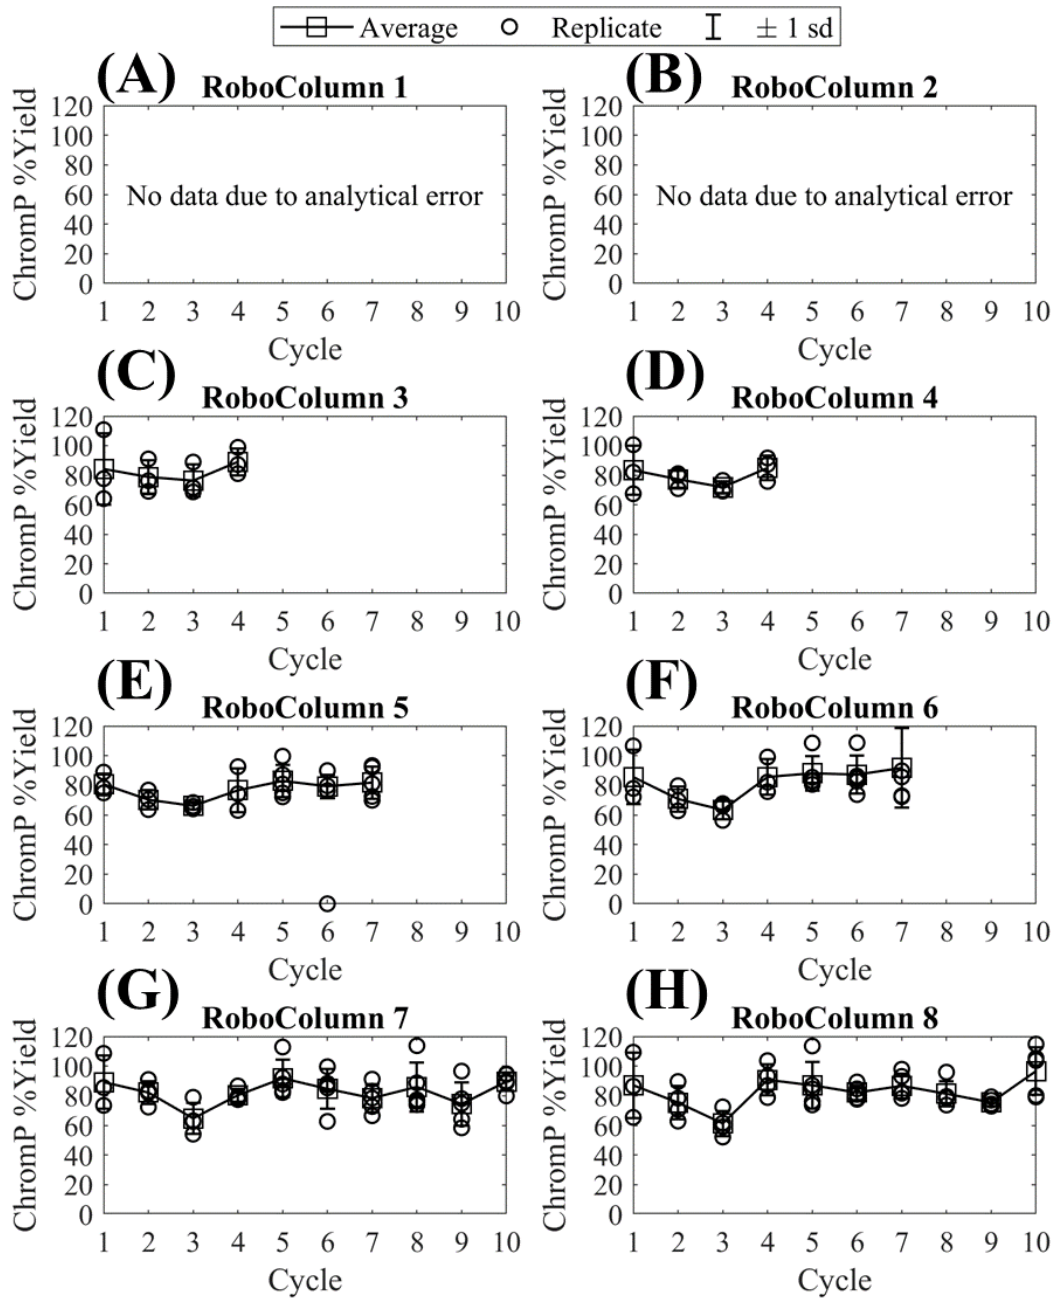

**Figure S3: Average high throughput chromatography flowthrough product pool yields as a function of resin re-use cycle based on anti-Nucleoprotein (N) protein quantitative western blotting ( $\square$ ) data for RoboColumns 1 – 8 in (A) – (H), respectively. In (A) – (H), open circle ( $\circ$ ) symbol represents analytical replicates and error bars correspond to  $\pm 1$  standard deviation (sd).**



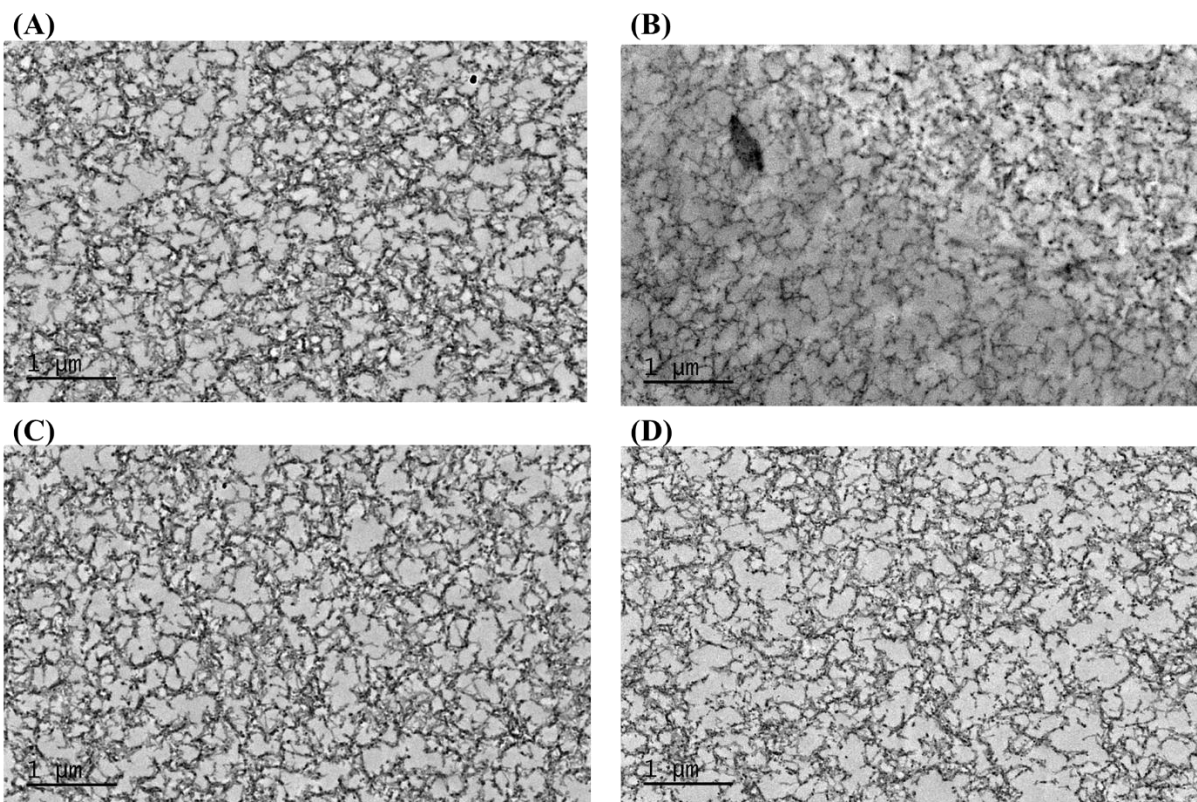

**Figure S4: Transmission electron microscopy images of: (A) Fresh and unused Capto Core 700; (B) – (D) resin samples collected at the end of the ten resin re-use cycles at lab scale from the top third, middle third, and the bottom third of the 20 mL Capto Core 700 column, respectively. In (A) – (D) scale bar is 1  $\mu\text{m}$  and the magnification was set at 23000X. Shown images were taken at the interior of the resin's beads.**



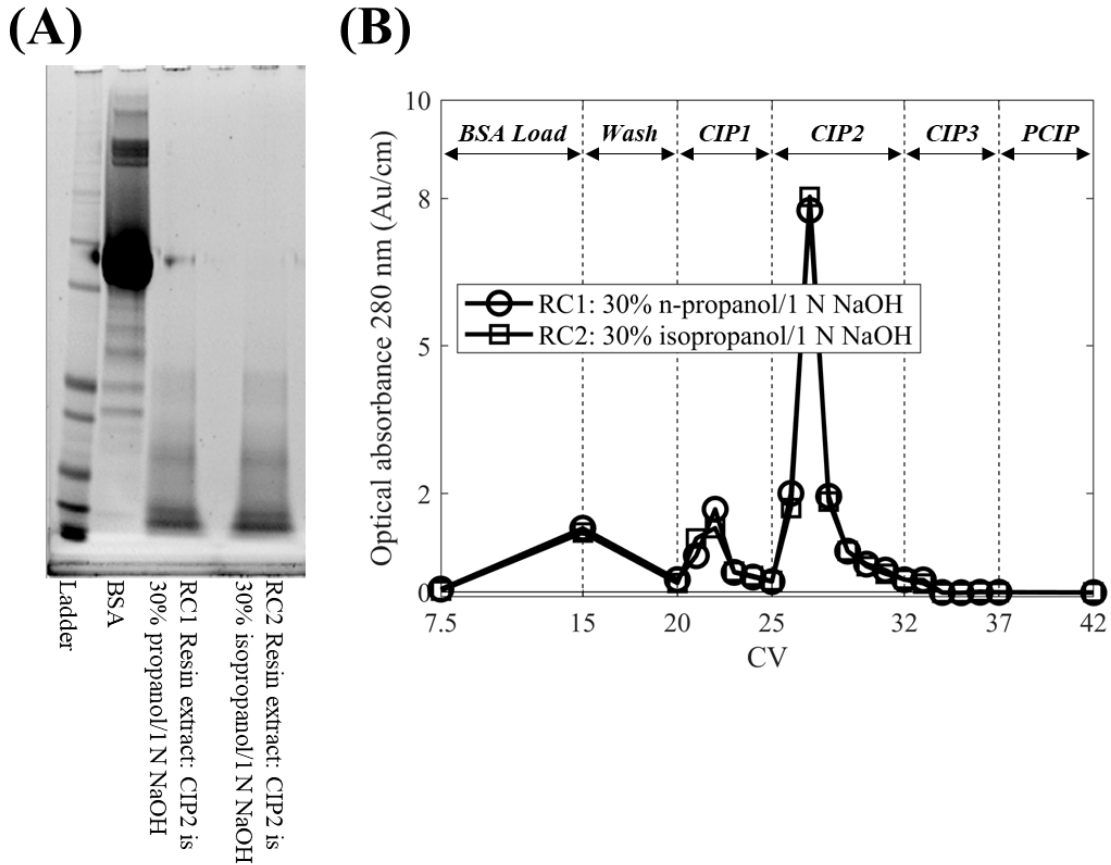

**Figure S5: Evaluation of three step (i.e., CIP1, CIP2, CIP3) cleaning in place (CIP) strategy for cleaning Capto Core 700 resin exposed to a bovine serum albumin (BSA) (2.74 g/L) load with two different solutions in CIP2, each tested in a separate 600  $\mu$ L RoboColumn (i.e., RC1 and RC2): (A) SDS-PAGE analysis of the loaded BSA and the RC1 and RC2 resin extracts, each obtained by using a 30% n-propanol/1 N NaOH or a 30% isopropanol/1 N NaOH solution in CIP2; (B) Optical absorbance at 280 nm as a function of column volumes (CVs). In (B), the ( $\circ$ ) and ( $\square$ ) symbols denote the use of 30% n-propanol/1 N NaOH and 30% isopropanol/1 N NaOH solutions in CIP2 for RC1 and RC2, respectively. Double-headed arrows denote the beginning and end of each phase for RC1 and RC2. PCIP refers to the post-CIP flush of the columns. The buffers and solutions used in the loading, washing, cleaning in place, and flushing the column post its CIP match those used in the lab scale BSA dynamic binding capacity measurement experiments. The same applied to the residence times per phase.**
